# Supplementary material for: Frequent KIT Mutations in Human Gastrointestinal Stromal Tumors
Source: PubMed Central journal article supplement — Sci Rep. 2014 Aug 1;4:5907. doi: 10.1038/srep05907 (PMC4118194; doi:10.1038/srep05907), 2014-08-01
Supplement: srep05907-s1.pdf [file srep05907-s1.pdf]

## Frequent KIT Mutations in Human Gastrointestinal Stromal Tumors

Zhi Xu<sup>1#</sup>, Xinying Huo<sup>1#</sup>, Chuanning Tang<sup>2</sup>, Hua Ye<sup>2</sup>, Vijayalakshmi Nandakumar<sup>3</sup>, Feng Lou<sup>2</sup>, Dandan Zhang<sup>2</sup>, Shouwen Jiang<sup>2</sup>, Hong Sun<sup>2</sup>, Haichao Dong<sup>2</sup>, Guangchun Zhang<sup>2</sup>, Zhiyuan Liu<sup>2</sup>, Zhishou Dong<sup>2</sup>, Baishuai Guo<sup>2</sup>, He Yan<sup>2</sup>, Chaowei Yan<sup>2</sup>, Lu Wang<sup>2</sup>, Ziyi Su<sup>2</sup>, Yangyang Li<sup>2</sup>, Dongying Gu<sup>1</sup>, Xiaojing Zhang<sup>1</sup>, Xiaomin Wu<sup>1</sup>, Xiaowei Wei<sup>1</sup>, Lingzhi Hong<sup>1</sup>, Yangmei Zhang<sup>1</sup>, Jinsong Yang<sup>1</sup>, Yonglin Gong<sup>1</sup>, Cuiju Tang<sup>1</sup>, Lindsey Jones<sup>3</sup>, Xue F Huang<sup>3</sup>, Si-Yi Chen<sup>3\*</sup>, Jinfei Chen<sup>1\*</sup>

<sup>1</sup>Department of Oncology, Nanjing First Hospital,  
Nanjing Medical University, Nanjing 210006, China.

<sup>2</sup>San Valley Biotechnology Inc., Beijing 100044, China

<sup>3</sup>Norris Comprehensive Cancer Center,  
Department of Molecular Microbiology and Immunology, Keck School of Medicine,  
University of Southern California, Los Angeles, CA 90033, USA.

<sup>#</sup>These two authors contributed equally.

\*Corresponding Authors:

Jinfei Chen, MD, Department of Oncology, Nanjing First Hospital, Nanjing Medical University, 68 Changle Road, Nanjing, 210006, P. R. China; Fax: +86 25 87726234; Tel: +86 25 87726242; Email: jinfeichen@sohu.com.

Dr. Si-Yi Chen, MD., Ph.D., Norris Comprehensive Cancer Center, Department of Molecular Microbiology and Immunology, Keck School of Medicine, University of Southern California, Los Angeles, CA 90033, USA. E-mail: siyichen@usc.edu; Tel: 323 442 7727; Fax: 323 442 7729.

## Supplemental Figure Legend

**Supplementary Fig. 1.** Filter process of variants. Note: (a) Strand-biased variants were eliminated using Integrative Genomics Viewer (IGV) software (<http://www.broadinstitute.org/igv>); (b) Variants in AMPL339432 should be eliminated, because this amplicon is not uniquely matched to PIK3CA in the human genome; (c) All of our statistical analysis was based on the data in blue box (Missense and in/del mutations).

**Supplementary Fig. 2.** Sequence read distribution across 189 amplicons generated from 121 FFPE specimens, normalized to 300,000 reads per sample.

A. Distribution of average coverage of each amplicon. Data are showed as mean  $\pm$ SD.

B. Number of amplicons with a given read depth, sorted in bins of 100 reads. (blue bars represent number of target amplicons within read depth, red line represents % of target amplicons  $\geq$  read depth).

**Supplementary Table 1.** Mutations (including Missense point mutations/deletion/insertion) frequencies in 45 genes (737 loci) in gastric and intestinal GISTs.

**Supplementary Table 2.** Frequencies of point mutations, insertion, and deletion mutations in 737 loci of 45 genes in 121 GISTs.

**Supplementary Table 3.** Validation by Sanger sequencing

**Supplementary Table 4.** Patients' characteristics for 121 GIST samples

Supplementary Fig.1. Filter process of variants

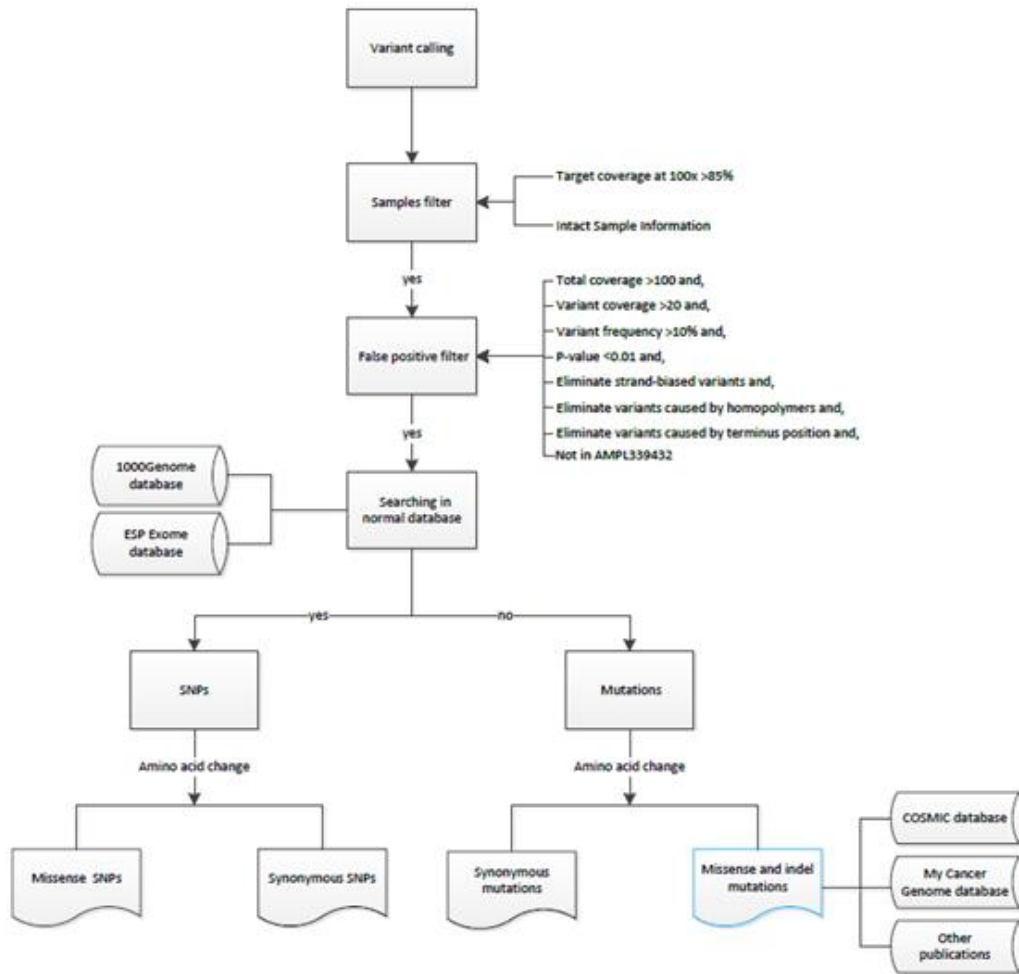

## Supplementary Figure2

**A**

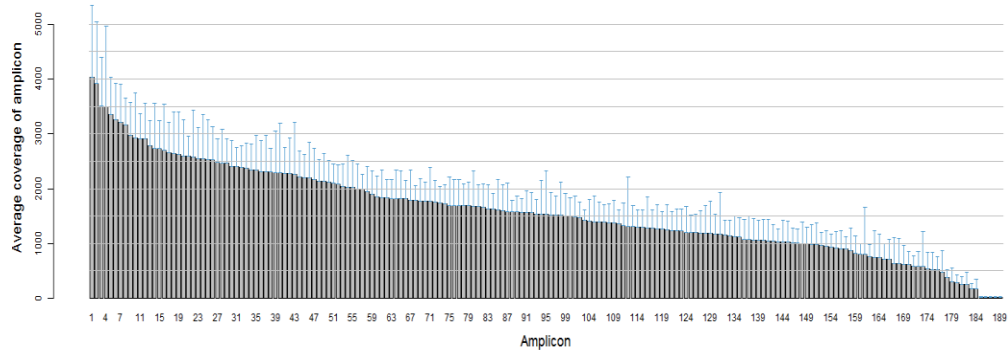

**B**

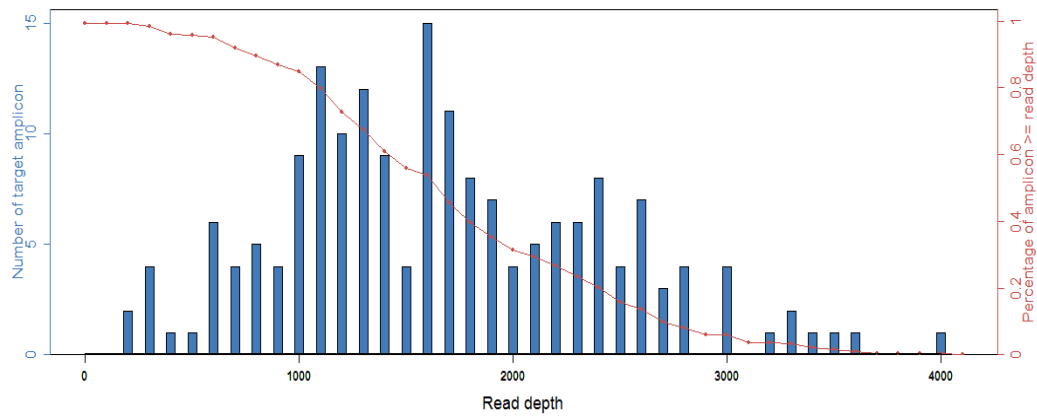

**Supplementary Table 1. Mutations (including Missense point mutations/deletion/insertion) frequencies in 45 genes (737 loci) in gastric and intestinal GISTs.**

| Genes   | Number of samples with mutations (Mutation frequency in 121 samples) | Number of gastric samples with mutations (Mutation frequency in 76 gastric samples) | Number of intestinal samples with mutations (Mutation frequency in 45 intestinal samples) |
|---------|----------------------------------------------------------------------|-------------------------------------------------------------------------------------|-------------------------------------------------------------------------------------------|
| ABL1    | 0(0.0%)                                                              | 0(0.0%)                                                                             | 0(0.0%)                                                                                   |
| AKT1    | 0(0.0%)                                                              | 0(0.0%)                                                                             | 0(0.0%)                                                                                   |
| ALK     | 0(0.0%)                                                              | 0(0.0%)                                                                             | 0(0.0%)                                                                                   |
| APC     | 0(0.0%)                                                              | 0(0.0%)                                                                             | 0(0.0%)                                                                                   |
| ATM     | 0(0.0%)                                                              | 0(0.0%)                                                                             | 0(0.0%)                                                                                   |
| BRAF    | 1(0.8%)                                                              | 1(1.3%)                                                                             | 0(0.0%)                                                                                   |
| CDH1    | 1(0.8%)                                                              | 0(0.0%)                                                                             | 1(2.2%)                                                                                   |
| CDKN2A  | 0(0.0%)                                                              | 0(0.0%)                                                                             | 0(0.0%)                                                                                   |
| CSF1R   | 0(0.0%)                                                              | 0(0.0%)                                                                             | 0(0.0%)                                                                                   |
| CTNNB1  | 0(0.0%)                                                              | 0(0.0%)                                                                             | 0(0.0%)                                                                                   |
| EGFR    | 1(0.8%)                                                              | 0(0.0%)                                                                             | 1(2.2%)                                                                                   |
| ERBB2   | 0(0.0%)                                                              | 0(0.0%)                                                                             | 0(0.0%)                                                                                   |
| ERBB4   | 1(0.8%)                                                              | 1(1.3%)                                                                             | 0(0.0%)                                                                                   |
| FBXW7   | 0(0.0%)                                                              | 0(0.0%)                                                                             | 0(0.0%)                                                                                   |
| FGFR1   | 0(0.0%)                                                              | 0(0.0%)                                                                             | 0(0.0%)                                                                                   |
| FGFR2   | 0(0.0%)                                                              | 0(0.0%)                                                                             | 0(0.0%)                                                                                   |
| FGFR3   | 0(0.0%)                                                              | 0(0.0%)                                                                             | 0(0.0%)                                                                                   |
| FLT3    | 3(2.5%)                                                              | 3(3.9%)                                                                             | 0(0.0%)                                                                                   |
| GNAS    | 0(0.0%)                                                              | 0(0.0%)                                                                             | 0(0.0%)                                                                                   |
| HNF1A   | 0(0.0%)                                                              | 0(0.0%)                                                                             | 0(0.0%)                                                                                   |
| HRAS    | 0(0.0%)                                                              | 0(0.0%)                                                                             | 0(0.0%)                                                                                   |
| IDH1    | 0(0.0%)                                                              | 0(0.0%)                                                                             | 0(0.0%)                                                                                   |
| JAK3    | 0(0.0%)                                                              | 0(0.0%)                                                                             | 0(0.0%)                                                                                   |
| KDR     | 0(0.0%)                                                              | 0(0.0%)                                                                             | 0(0.0%)                                                                                   |
| KIT     | 60(49.6%)                                                            | 41(53.9%)                                                                           | 19(42.2%)                                                                                 |
| KRAS    | 1(0.8%)                                                              | 1(1.3%)                                                                             | 0(0.0%)                                                                                   |
| MET     | 0(0.0%)                                                              | 0(0.0%)                                                                             | 0(0.0%)                                                                                   |
| MLH1    | 0(0.0%)                                                              | 0(0.0%)                                                                             | 0(0.0%)                                                                                   |
| MPL     | 0(0.0%)                                                              | 0(0.0%)                                                                             | 0(0.0%)                                                                                   |
| NOTCH1  | 0(0.0%)                                                              | 0(0.0%)                                                                             | 0(0.0%)                                                                                   |
| NPM1    | 0(0.0%)                                                              | 0(0.0%)                                                                             | 0(0.0%)                                                                                   |
| NRAS    | 0(0.0%)                                                              | 0(0.0%)                                                                             | 0(0.0%)                                                                                   |
| PDGFRA  | 1(0.8%)                                                              | 1(1.3%)                                                                             | 0(0.0%)                                                                                   |
| PIK3CA  | 0(0.0%)                                                              | 0(0.0%)                                                                             | 0(0.0%)                                                                                   |
| PTEN    | 1(0.8%)                                                              | 0(0.0%)                                                                             | 1(2.2%)                                                                                   |
| PTPN11  | 0(0.0%)                                                              | 0(0.0%)                                                                             | 0(0.0%)                                                                                   |
| RB1     | 0(0.0%)                                                              | 0(0.0%)                                                                             | 0(0.0%)                                                                                   |
| RET     | 0(0.0%)                                                              | 0(0.0%)                                                                             | 0(0.0%)                                                                                   |
| SMAD4   | 0(0.0%)                                                              | 0(0.0%)                                                                             | 0(0.0%)                                                                                   |
| SMARCB1 | 0(0.0%)                                                              | 0(0.0%)                                                                             | 0(0.0%)                                                                                   |
| SMO     | 0(0.0%)                                                              | 0(0.0%)                                                                             | 0(0.0%)                                                                                   |
| SRC     | 0(0.0%)                                                              | 0(0.0%)                                                                             | 0(0.0%)                                                                                   |
| STK11   | 0(0.0%)                                                              | 0(0.0%)                                                                             | 0(0.0%)                                                                                   |
| TP53    | 1(0.8%)                                                              | 1(1.3%)                                                                             | 0(0.0%)                                                                                   |
| VHL     | 1(0.8%)                                                              | 0(0.0%)                                                                             | 1(2.2%)                                                                                   |

**Supplementary Table 2. Frequencies of point mutations, insertion and deletion mutations in 737 loci of 45 genes in 121 GISTs.**

| Gene Mutations                                                 | Number of samples with this mutation site | Number of samples with this mutation gene | Mutation Frequency | Gene mutation frequency in publications | Site mutation frequency in gene in publications | If reported in GIST in COSMIC database | If reported in GIST in MyCancerGenom |
|----------------------------------------------------------------|-------------------------------------------|-------------------------------------------|--------------------|-----------------------------------------|-------------------------------------------------|----------------------------------------|--------------------------------------|
| BRAFc.1799T>A                                                  | 1                                         | 1                                         | 0.8%               | <1%<br>(mycancergenome)                 | -                                               | YES                                    | YES                                  |
| KITc.1667_1672del6;c.1669_1674del6                             | 7                                         |                                           |                    |                                         |                                                 | YES                                    | NO                                   |
| KITc.1679T>A                                                   | 4                                         |                                           |                    |                                         |                                                 | YES                                    | NO                                   |
| KITc.1675_1677delGTT;c.1678_1680delGTT;<br>c.1679_1681delTTG   | 3                                         |                                           |                    |                                         |                                                 | YES                                    | NO                                   |
| KITc.1669T>C                                                   | 5                                         |                                           |                    |                                         |                                                 | YES                                    | NO                                   |
| KITc.1674_1676AGGT>G                                           | 1                                         |                                           |                    |                                         |                                                 | NO                                     | NO                                   |
| KITc.1672_1680del9                                             | 1                                         |                                           |                    |                                         |                                                 | YES                                    | NO                                   |
| KITc.1675_1683del9;c.1676_1684del9;c.167<br>3_1681delAGGTTGTTG | 2                                         | 33                                        | 27.3%              | ~85%<br>(mycancergenome)                | ~85%*~70% (11<br>exon)<br>(mycancergenome)      | YES                                    | NO                                   |
| KITc.2466T>A                                                   | 2                                         |                                           |                    |                                         |                                                 | YES                                    | NO                                   |
| KITc.1694_1717GAAACAATTATGTTTACATAGA<br>CC>CCT                 | 1                                         |                                           |                    |                                         |                                                 | NO                                     | NO                                   |
| KITc.1676T>A                                                   | 4                                         |                                           |                    |                                         |                                                 | YES                                    | NO                                   |
| KITc.1676T>G                                                   | 2                                         |                                           |                    |                                         |                                                 | YES                                    | NO                                   |
| KITc.1660_1674del15;c.1661_1675del15                           | 1                                         |                                           |                    |                                         |                                                 | YES                                    | NO                                   |
| KITc.1670_1674TGGAAG>ACT                                       | 1                                         |                                           |                    |                                         |                                                 | NO                                     | NO                                   |

|                                        |   |   |      |                     |                                      |  |     |    |
|----------------------------------------|---|---|------|---------------------|--------------------------------------|--|-----|----|
| KITc.1735_1737delGAT;c.1733_1735delATG | 5 |   |      |                     |                                      |  | NO  | NO |
| KITc.1679T>G                           | 2 |   |      |                     |                                      |  | YES | NO |
| KITc.1727T>C                           | 2 |   |      |                     |                                      |  | YES | NO |
| KITc.2464A>T                           | 1 |   |      |                     |                                      |  | YES | NO |
| KITc.1728_1729insCCTTATGATCACAAA       | 1 |   |      |                     |                                      |  | NO  | NO |
| KITc.1668_1721del54                    | 1 |   |      |                     |                                      |  | YES | NO |
| KITc.1667_1673CAGTGGAA>CCCAC           | 1 |   |      |                     |                                      |  | YES | NO |
| KITc.1676T>C                           | 1 |   |      |                     |                                      |  | YES | NO |
| KITc.1669T>A                           | 2 |   |      |                     |                                      |  | YES | NO |
| KITc.1679_1680TT>AG                    | 1 |   |      |                     |                                      |  | YES | NO |
| KITc.1669T>G                           | 1 |   |      |                     |                                      |  | YES | NO |
| KITc.1669_1710del42                    | 1 |   |      |                     |                                      |  | YES | NO |
| KITc.1653_1676del24                    | 1 |   |      |                     |                                      |  | YES | NO |
| KITc.1670_1678del9                     | 1 |   |      |                     |                                      |  | YES | NO |
| KITc.1689_1733del45                    | 1 |   |      |                     |                                      |  | NO  | NO |
| KITc.1670_1675del6                     | 1 |   |      |                     |                                      |  | YES | NO |
| KITc.2153C>G                           | 1 |   |      |                     |                                      |  | NO  | NO |
| KITc.1673_1693del21                    | 1 |   |      |                     |                                      |  | YES | NO |
| KITc.1671_1672GA>TG                    | 1 |   |      |                     |                                      |  | NO  | NO |
| KITc.1667_1673>CC                      | 1 |   |      |                     |                                      |  | YES | NO |
| KRASc.34G>C                            | 1 | 1 | 0.8% | ~5% <sup>[4]</sup>  | -                                    |  | NO  | NO |
| PDGFRAc.2525A>T                        | 1 | 1 | 0.8% | ~5%(mycancergenome) | ~5%*~5%(18 exon)<br>(mycancergenome) |  | YES | NO |

**Supplementary Table 3. Sanger results**

| #  | Sample ID | Cosmic ID   | Gene | CDS change                                              | Amino acid change   | Variant frequency (%) | Sanger result Consistent |
|----|-----------|-------------|------|---------------------------------------------------------|---------------------|-----------------------|--------------------------|
| 1  | 13        | 26085       | MLH1 | c.1151T>A                                               | p.V384D             | 66.81                 | YES                      |
| 2  | 95        | 26085       | MLH1 | c.1151T>A                                               | p.V384D             | 46.96                 | YES                      |
| 3  | 25        | 28026       | KIT  | c.1621A>C                                               | p.M541L             | 50.38                 | YES                      |
| 4  | 31        | -----       | KIT  | c.1653_1676del24                                        | p.551del_frameshift | 50.89                 | YES                      |
| 5  | 112       | 1210; 1217  | KIT  | c.1667_1672del6;c.1669_1674del6                         | p.W557_K558del      | 45.39                 | YES                      |
| 6  | 95        | 1210;1217   | KIT  | c.1667_1672del6;c.1669_1674del6                         | p.W557_K558del      | 35.82                 | YES                      |
| 7  | 76        | -----       | KIT  | c.1670_1674TGGAAG>ACT                                   | p.W557_K558>T       | 39.18                 | YES                      |
| 8  | 109       | -----       | KIT  | c.1667_1673CAGTGGAA>CCCAC                               | p.Q556_K558>PT      | 33.01                 | YES                      |
| 9  | 76        | -----       | KIT  | c.1670_1674TGGAAG>ACT                                   | p.W557_K558>T       | 39.18                 | YES                      |
| 10 | 25        | 1221        | KIT  | c.1669T>G                                               | p.W557G             | 36.7                  | YES                      |
| 11 | 27        | -----       | KIT  | c.1674_1676AGGT>G                                       | p.K558_V559>S       | 86.18                 | YES                      |
| 12 | 101       | 1240        | KIT  | c.1673_1693del21                                        | p.558del_frameshift | 75.45                 | YES                      |
| 13 | 107       | 1250;1254   | KIT  | c.1675_1683del9;c.1676_1684del9;c.1673_1681delAGGTTGTTG | p.V559_E561del      | 48.06                 | YES                      |
| 14 | 106       | 1252        | KIT  | c.1676T>A                                               | p.V559D             | 42.72                 | YES                      |
| 15 | 91        | 1257        | KIT  | c.1679T>A                                               | p.V560D             | 37.31                 | YES                      |
| 16 | 90        | 1290        | KIT  | c.1727T>C                                               | p.L576P             | 51.25                 | YES                      |
| 17 | 107       | 1290        | KIT  | c.1727T>C                                               | p.L576P             | 42.21                 | YES                      |
| 18 | 111       | 1294;255168 | KIT  | c.1735_1737delGAT;c.1733_1735delATG                     | p.D579del           | 59.83                 | YES                      |
| 19 | 92        | 19109       | KIT  | c.2464A>T                                               | p.N822Y             | 27.88                 | YES                      |
| 20 | 49        | 1321        | KIT  | c.2466T>A                                               | p.N822K             | 27.55                 | YES                      |
| 21 | 106       | 710         | MET  | c.1124A>G                                               | p.N375S             | 50.73                 | YES                      |



# Sanger figures

#1

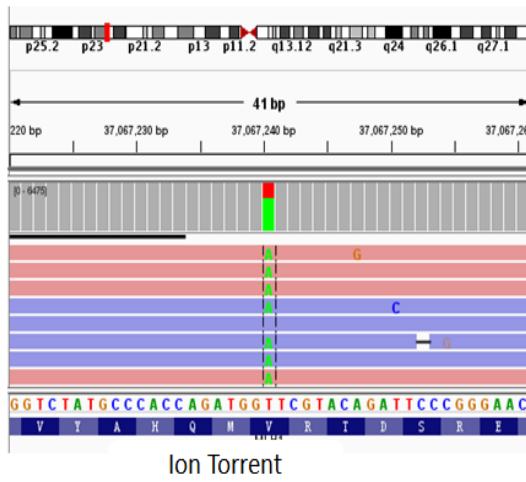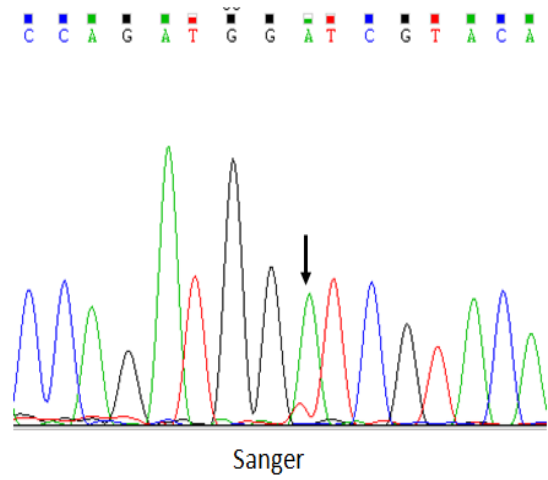

#2

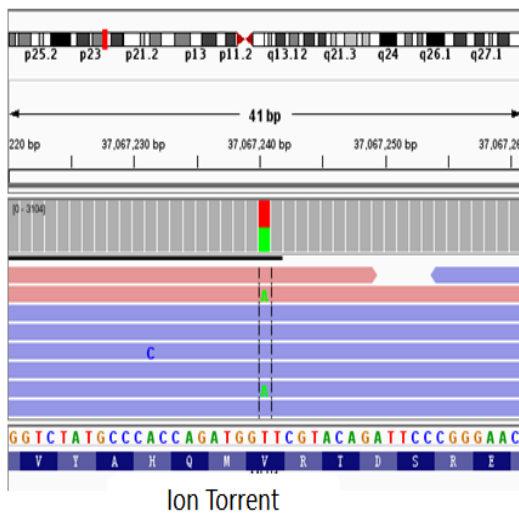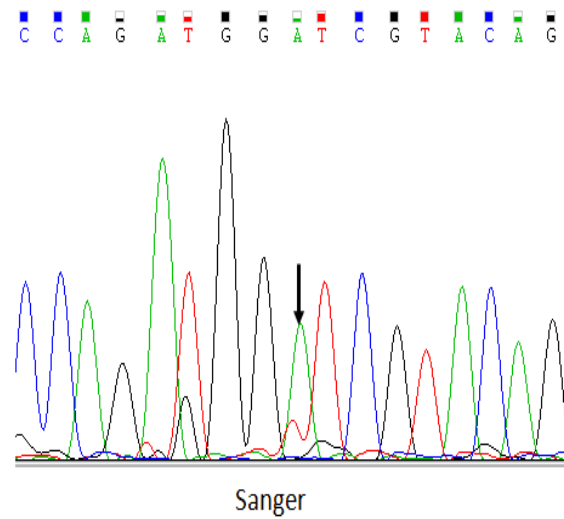

#3

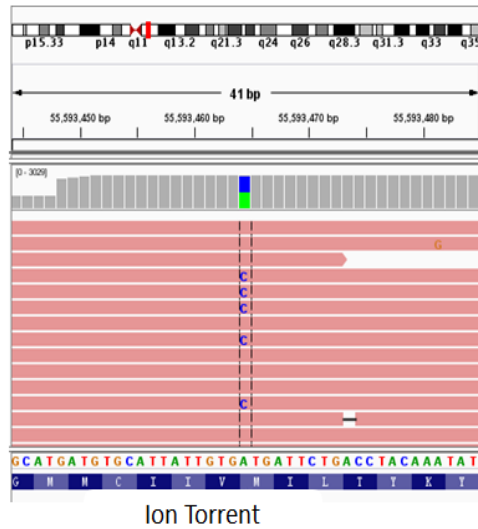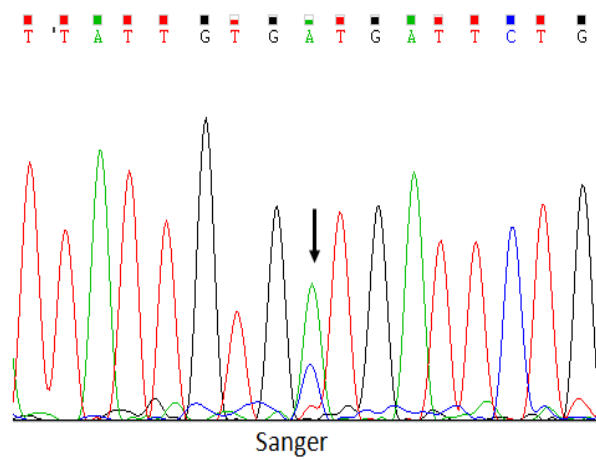

#4

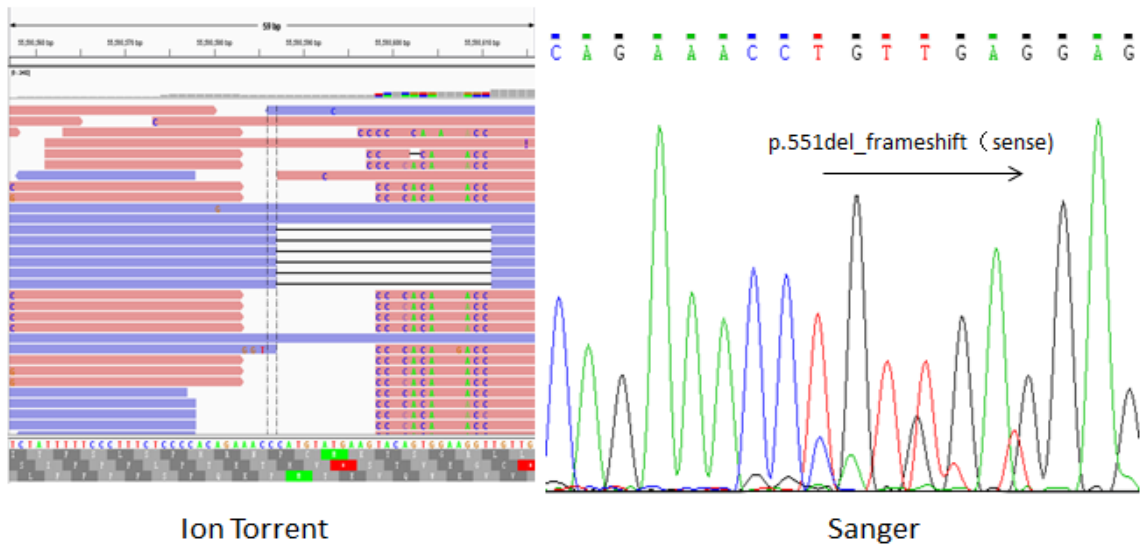

#5

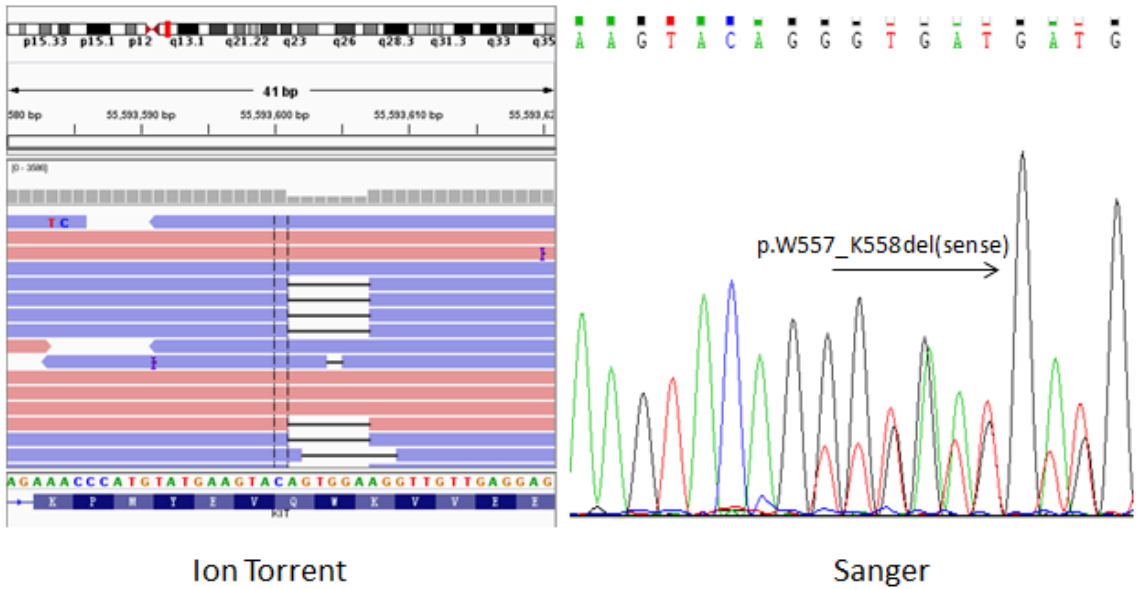

#6

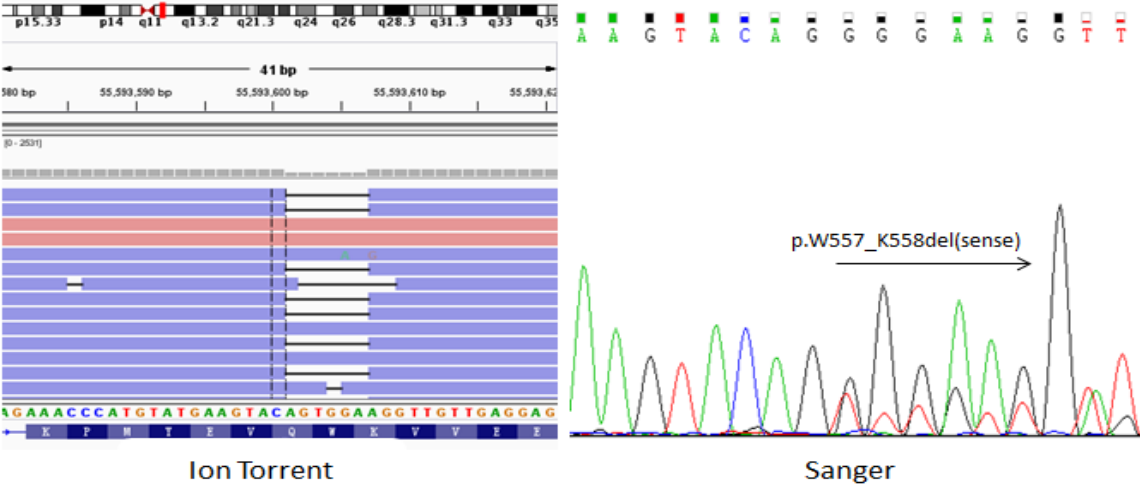

#7

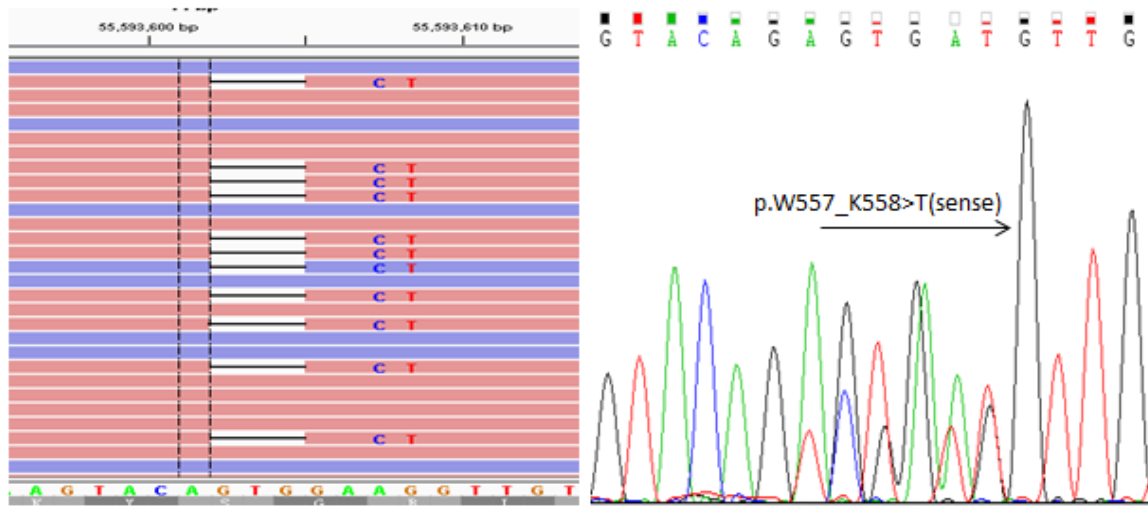

Ion Torrent

Sanger

#8

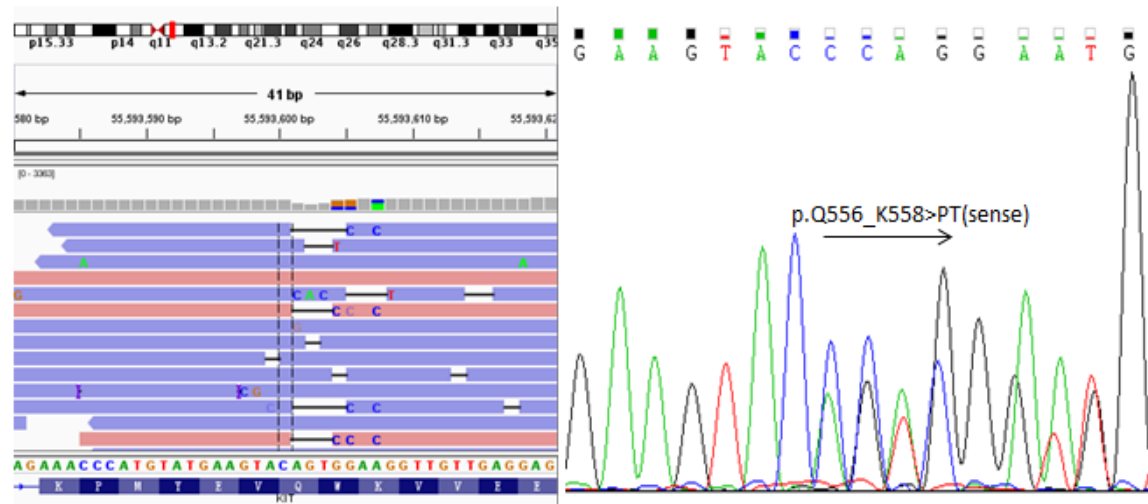

Ion Torrent

Sanger

#9

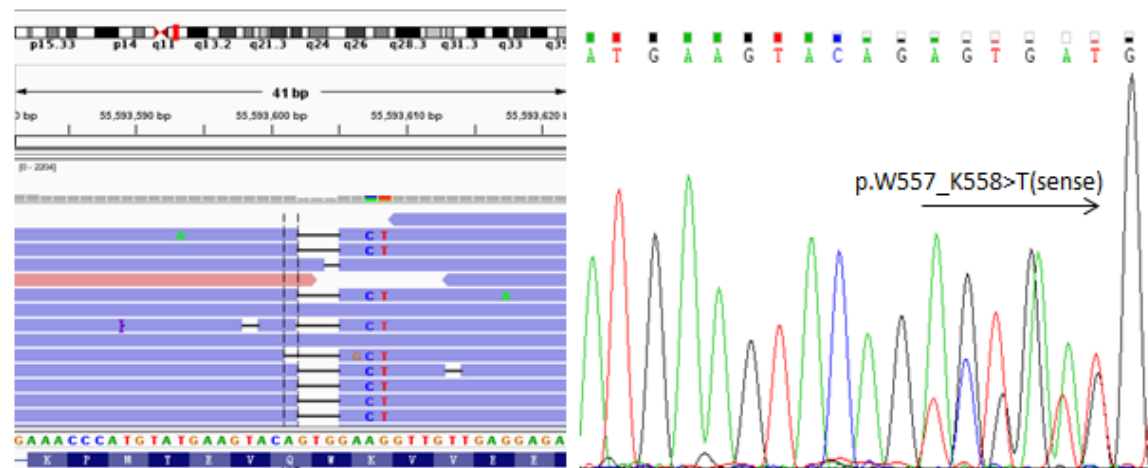

Ion Torrent

Sanger

#10

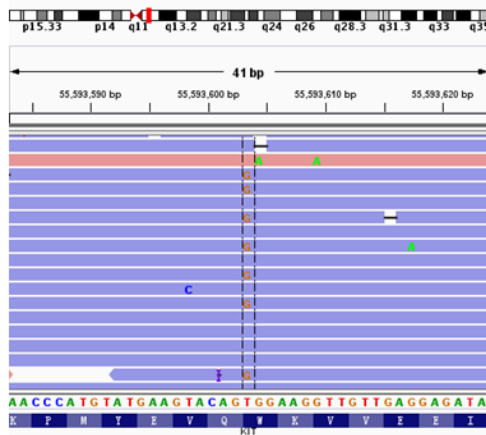

Ion Torrent

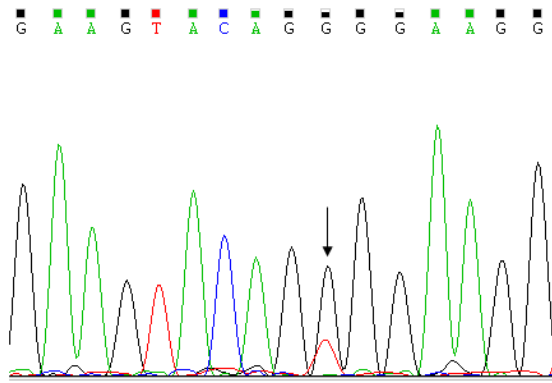

Sanger

#11

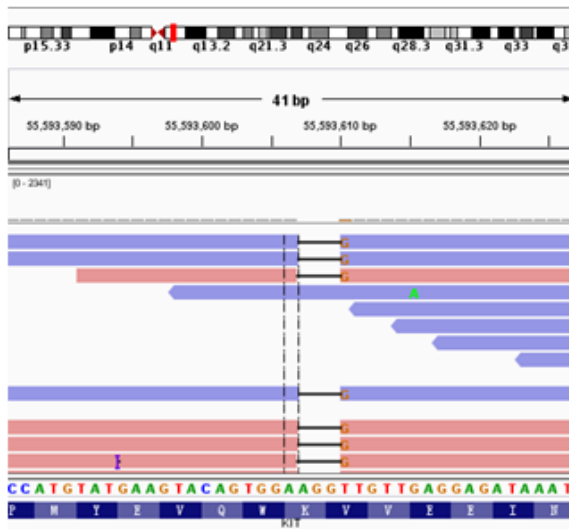

Ion Torrent

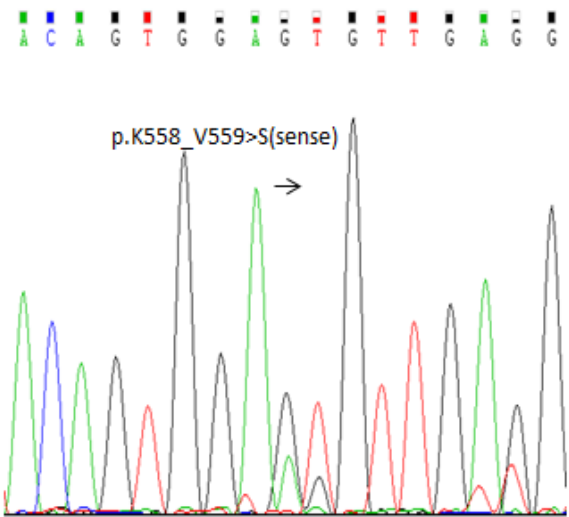

Sanger

#12

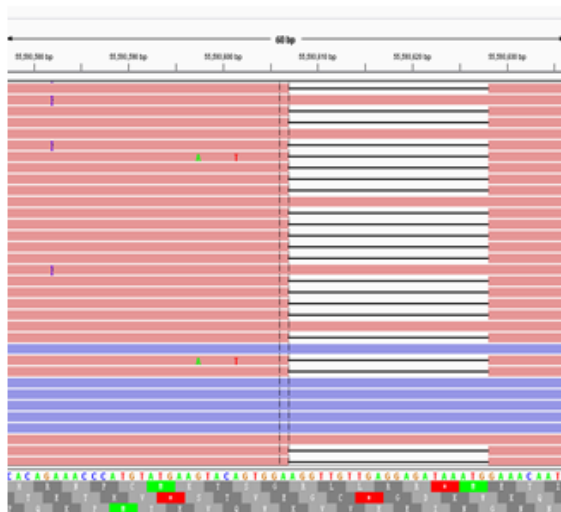

Ion Torrent

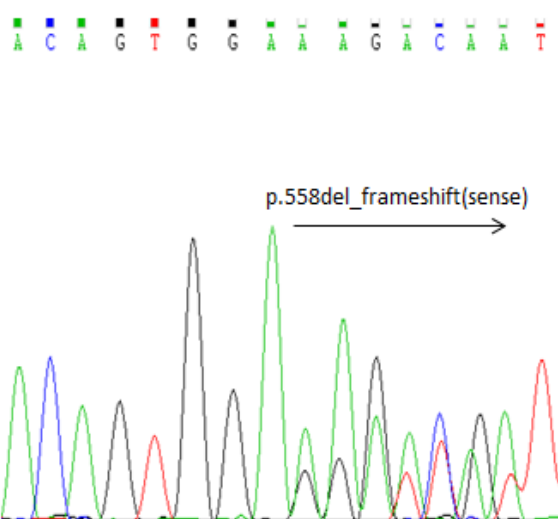

Sanger

#13

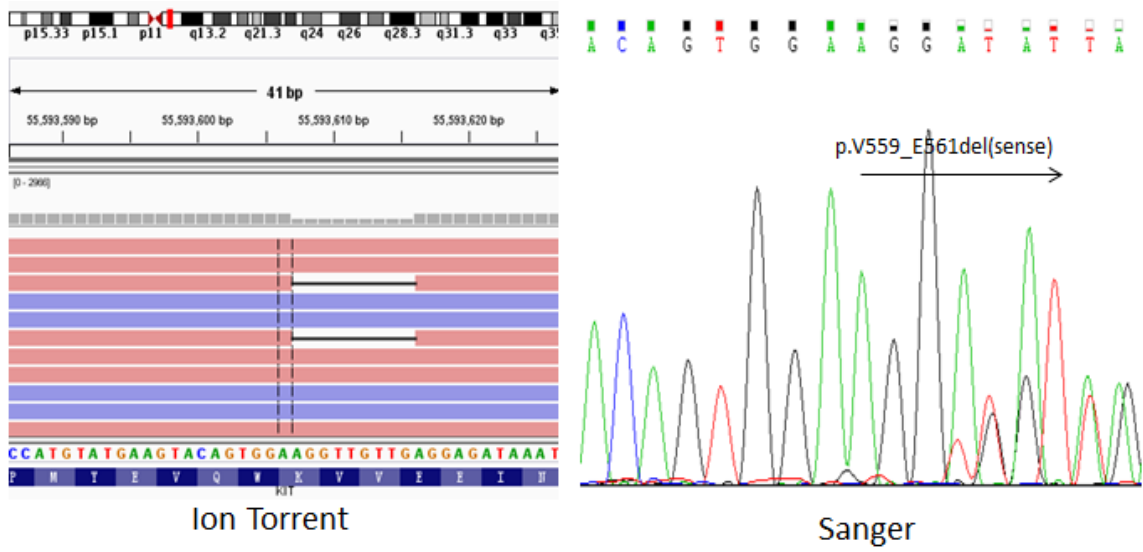

#14

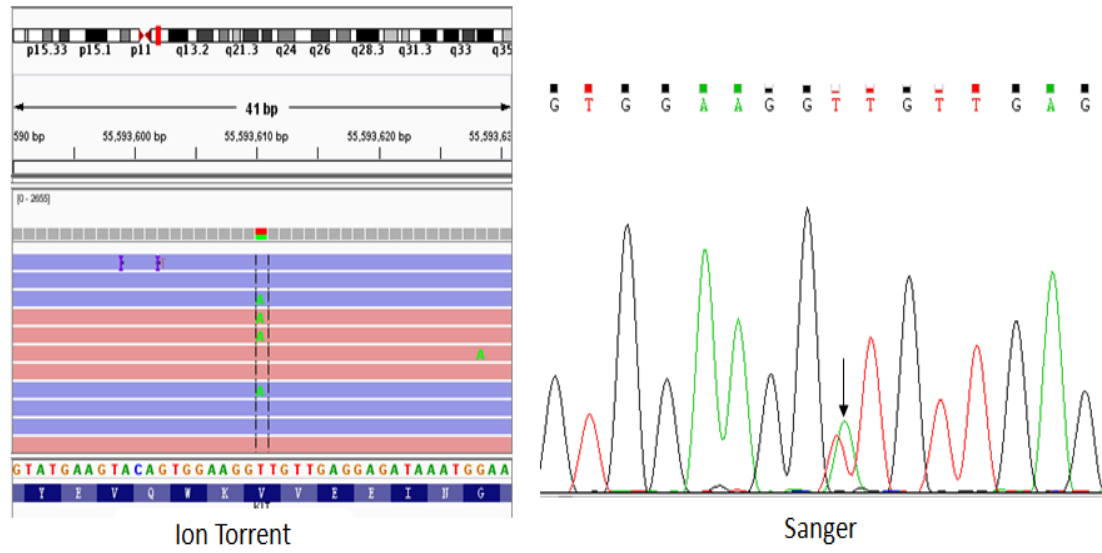

#15

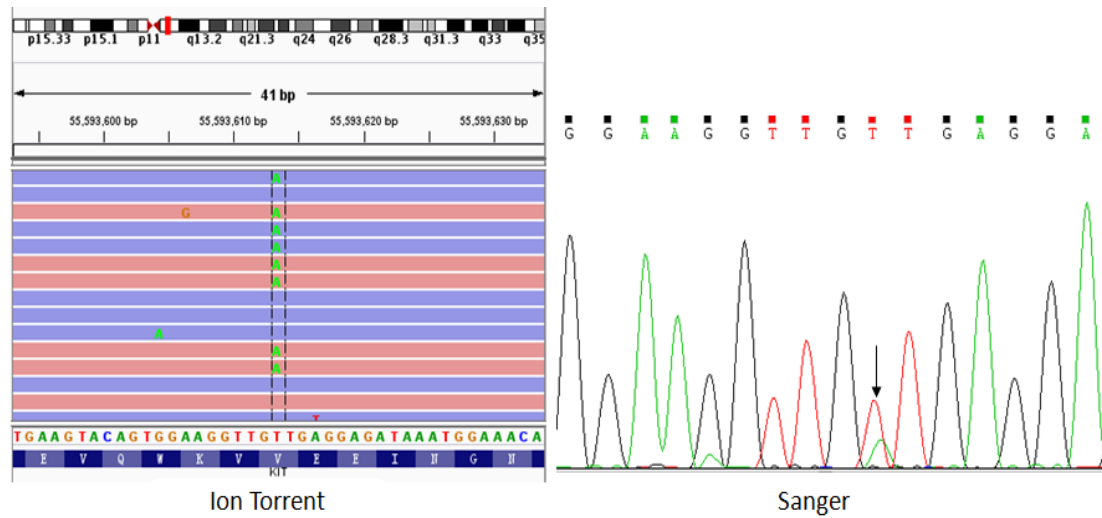

#16

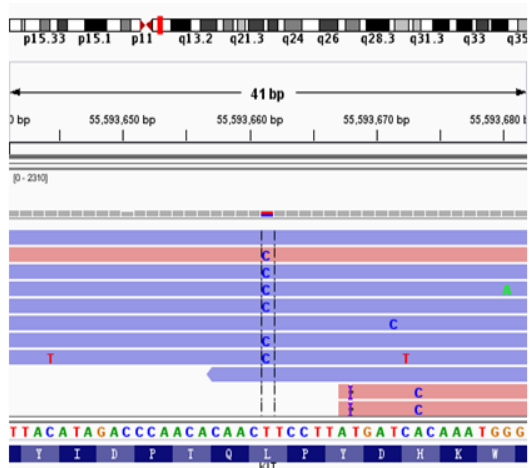

Ion Torrent

C A C A A C T T C C T T C C T T A G A T

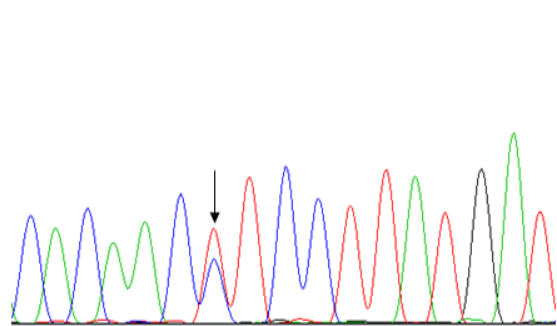

Sanger

#17

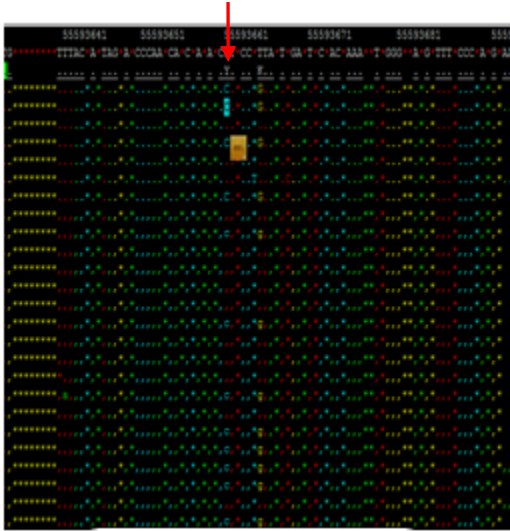

Ion Torrent

C A C A A C T T C C G T A T G A T C A

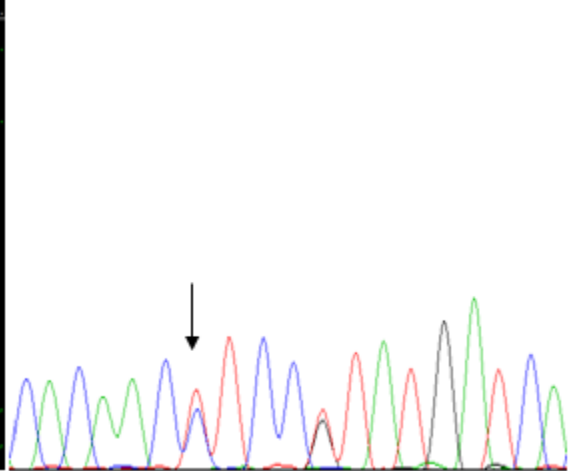

Sanger

#18

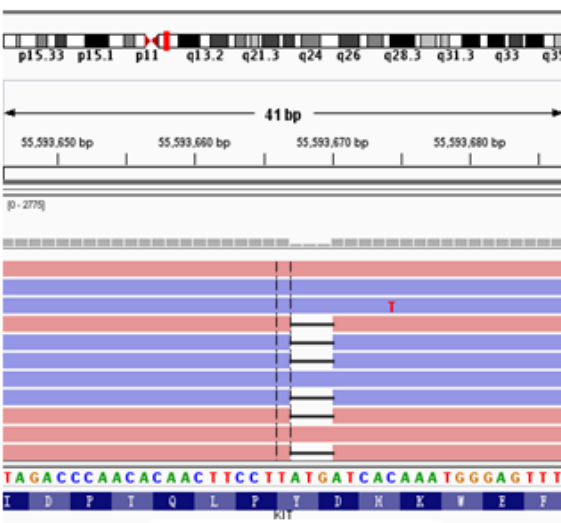

Ion Torrent

T T C C T T A T C A A A T G G

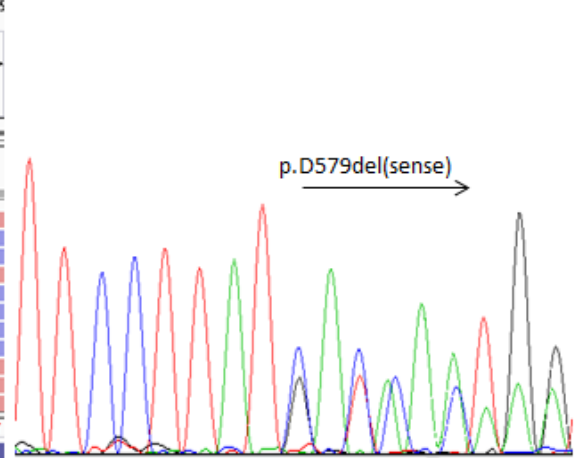

Sanger

#19

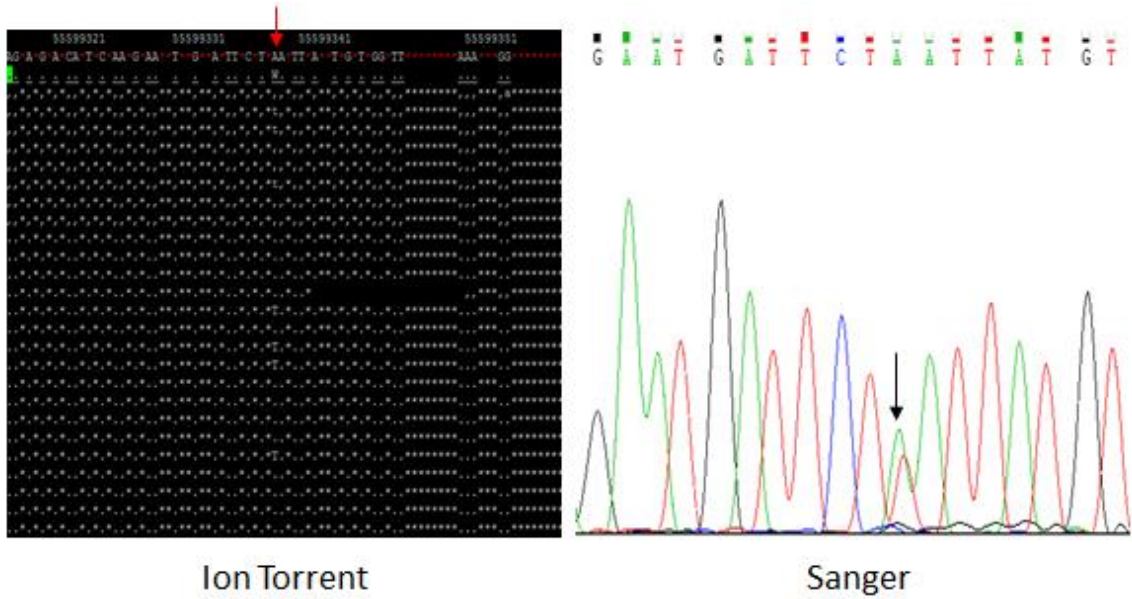

#20

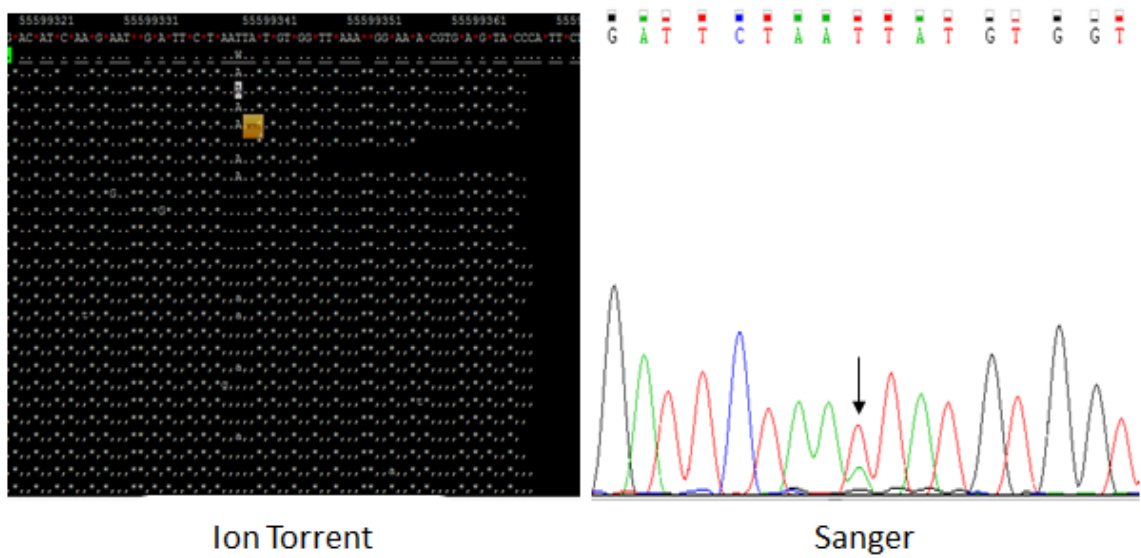

#21

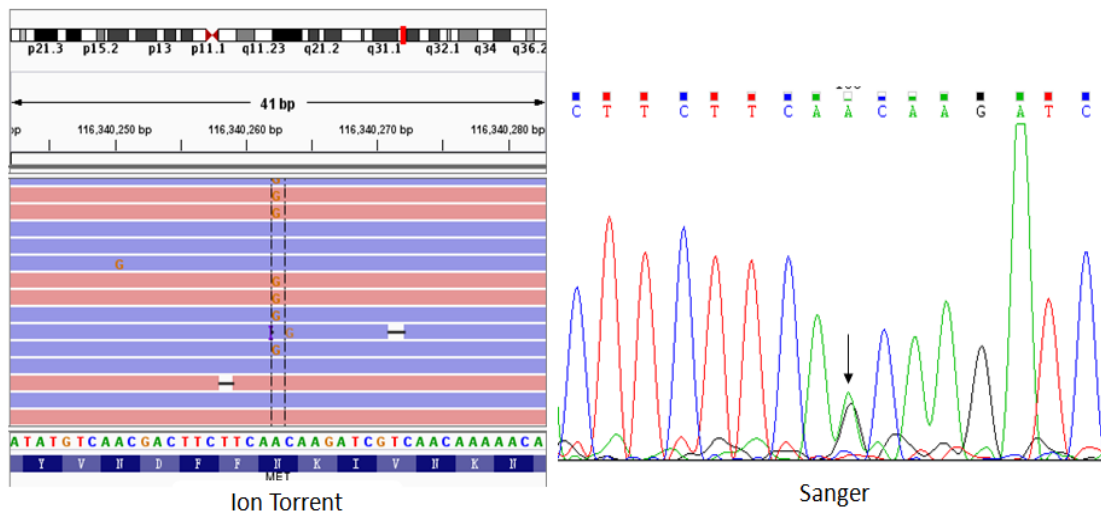

**Supplementary Table 5.** Clinical features of 121 GIST patients.

| Characteristic |               | #                      |
|----------------|---------------|------------------------|
| Gender         | female        | 59(48.8%)              |
|                | male          | 62(51.2%)              |
| Age            | Average 59±11 | Median:59, range:24-82 |
| Histology      | gastric       | 76(62.8%)              |
|                | intestinal    | 45(37.2%)              |
| CD117          | CD117-        | 3(2.5%)                |
|                | CD117+        | 17(14.0%)              |
|                | CD117++       | 23(19.0%)              |
|                | CD117+++      | 21(17.4%)              |
|                | unknown       | 57(47.1%)              |
| CD34           | CD34-         | 12(9.9%)               |
|                | CD34+         | 20(16.5%)              |
|                | CD34++        | 16(13.2%)              |
|                | CD34+++       | 17(14.0%)              |
|                | unknown       | 56(46.3%)              |
